# Supplementary material for: A Functional Binding Domain in the Rbpr2 Receptor is Required for Vitamin A Transport, Ocular Retinoid Homeostasis, and Photoreceptor Cell Survival in Zebrafish
Source: Preprints.org preprint supplement (doi:10.20944/preprints202003.0296.v1), 2020-03-19
Supplement: Supplementary file 1 [file supplementary]

## SUPPLEMENTAL INFORMATION

**Title: A functional binding domain in the Rbpr2 receptor is required for vitamin A transport, ocular retinoid homeostasis, and photoreceptor cell survival in zebrafish**

**Authors:** Ashish K. Solanki<sup>1</sup>, Altaf A. Kondkar<sup>2</sup>, Joseph Fogerty<sup>3</sup>, Yanhui Su<sup>1</sup>, Seok-hyung Kim<sup>1</sup>, Joshua H. Lipschutz<sup>1,4</sup>, Deepak Nihalani<sup>1</sup>, Brian D. Perkins<sup>3</sup> and Glenn P. Lobo<sup>1,5\*</sup>.

### **Affiliations:**

<sup>1</sup>Department of Medicine, Medical University of South Carolina, Charleston, SC, 29425, USA. lobo@musc.edu (G.P.L.); solankia@musc.edu (A.K.S.); su@musc.edu (Y.S.); nihalani@musc.edu (D.N.); lipschut@musc.edu (J.H.L.); kims@musc.edu (S.H.K.).

<sup>2</sup>Glaucoma Research Chair, Department of Ophthalmology, College of Medicine, King Saud University, Riyadh, Saudi Arabia. akondkar@ksu.edu.sa (A.A.K.)

<sup>3</sup>Department of Ophthalmic Research, Cole Eye Institute, Cleveland Clinic, Cleveland, OH 44195, USA. fogertj@ccf.org (J.F.); perkinB2@ccf.org (B.P.).

<sup>4</sup>Ralph H. Johnson VA Medical Center, Division of Research, Charleston, SC 29420, USA. lipschut@musc.edu (J.H.L.).

<sup>5</sup>Department of Ophthalmology, Medical University of South Carolina, Charleston, SC, 29425, USA. lobo@musc.edu (G.P.L.)

### **\*Corresponding Author**

Glenn P. Lobo, Ph.D.  
Assistant Professor of Medicine  
Department of Medicine  
70 President Road  
Drug Discovery Building DDB513  
Charleston, SC 29425  
Office: 843-876-2371  
Email: [lobo@musc.edu](mailto:lobo@musc.edu)

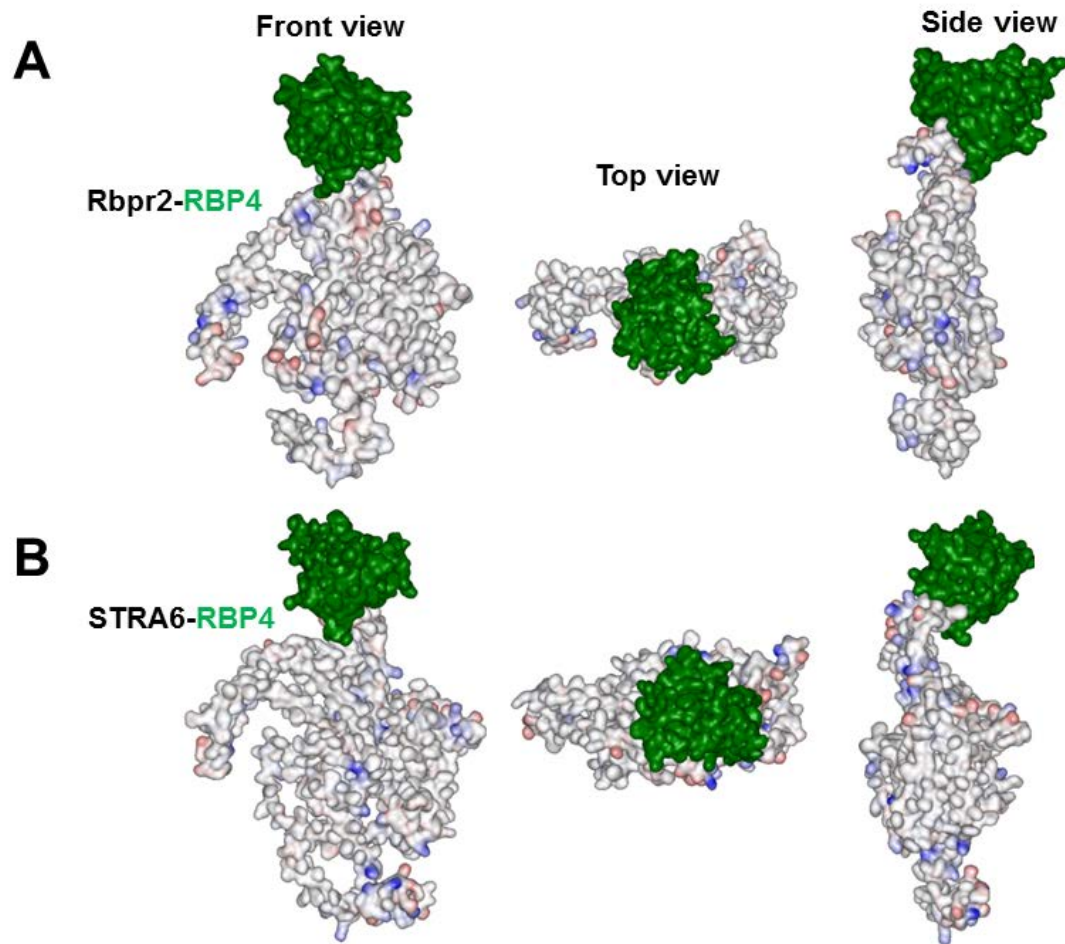

**Figure S1. Surface filled view of Rbpr2 and RBP4 protein-protein interactions based on HADDOCK docking analysis.**

Multiple surface filled views of (A) Zebrafish Rbpr2 with human RBP4, and (B) Zebrafish Stra6 with Human RBP4, protein-protein interactions are shown.

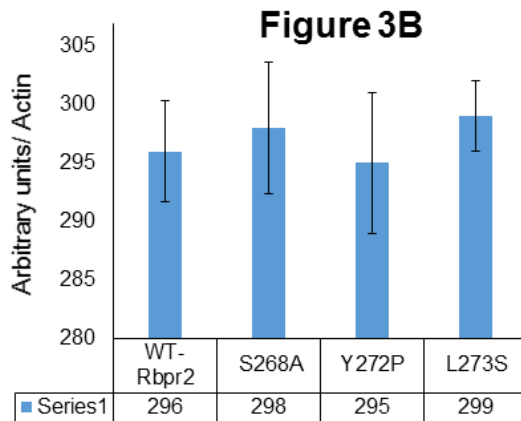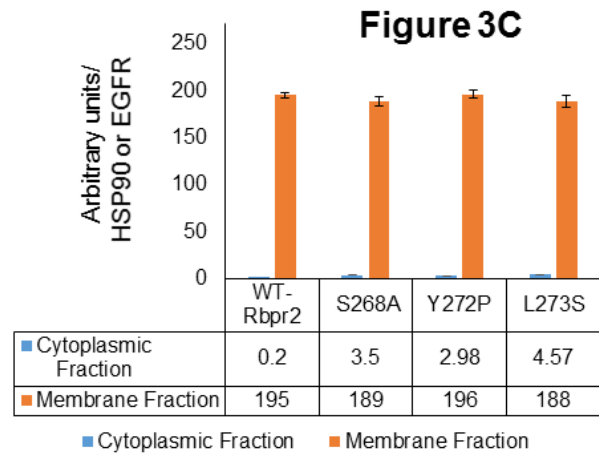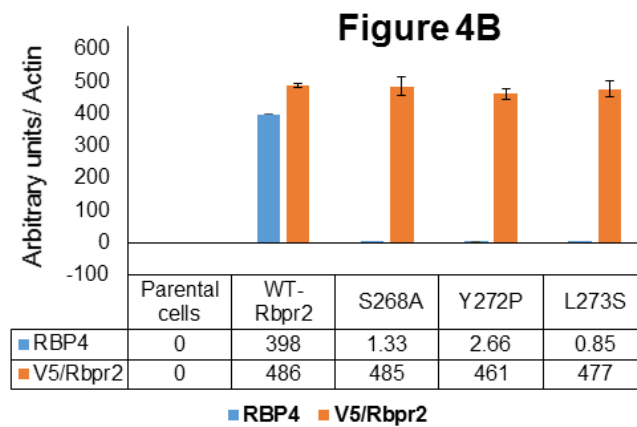

## Figure S2. Densitometry analysis of western blots.

Image J software was used to quantify (Arbitrary Units) protein bands from Figures 3B, 3C, and 4B. Analysis is representative from three western blot experiments.

**A**

Rbpr2-CRISPR-gRNA1 (PAM site) Proposed RBP4 binding residues

ACACCTTTGACAACTGGACTCTTTGAAGGACTCACTTGAACAGATACGATTGTCCTGCAATCAGACTGAG AGT GTG TTC ACA TAC CTT ATT CCC AGC  
S V F T Y L I P S

**B**

|                                 |                                        |
|---------------------------------|----------------------------------------|
| <b>WT-Rbpr2</b>                 | TTTGACAACTGGACTCTTTGAAGGACTCACTTGAACAG |
| Rbpr2 <sup>fs-muz98</sup>       | TTTGACAACT-----CTTTGAAGGACTCACTTGAACAG |
| <b>Rbpr2<sup>fs-muz99</sup></b> | TTTGACAACTCGACTCTTTG-AGGACTCACTTGAACAG |
| Rbpr2 <sup>fs-muz100</sup>      | TTTGA-----TTGAAGGACTCACTTGAACAG        |
| Rbpr2 <sup>fs-muz101</sup>      | TTTGACAACTCGAC-----AGGACTCACTTGAACAG   |
| Rbpr2 <sup>fs-muz102</sup>      | TTTGACAACTCGACTCTT--AGGACTCACTTGAACAG  |

**C**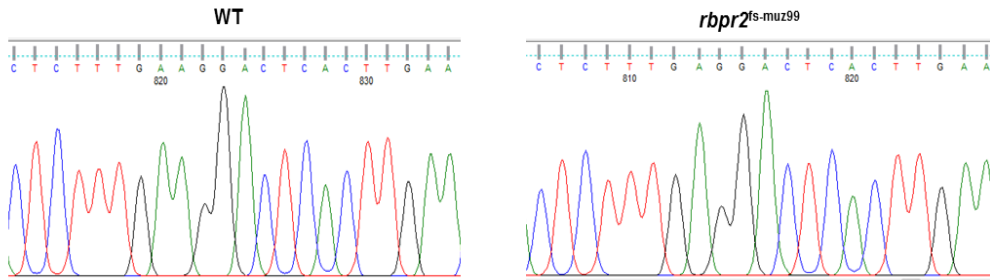

### Figure S3. Generation of *rbpr2*-RBP4 binding domain zebrafish mutants.

(A) The proposed RBP4 binding domain in zebrafish Rbpr2 was targeted using CRISPR gRNAs (underlined), PAM site shown in green. (B) The CRISPR/Cas9 cutting generated multiple mutant alleles. A 1-bp deletion in the zebrafish Rbpr2 (*rbpr2<sup>fs-muz99</sup>*) coding sequence that results in a frameshift that affects the downstream SYL-RBP4 binding domain was chosen for all further analysis. (C) Sequencing chromatograms from wild-type (WT) and *rbpr2<sup>fs-muz99</sup>* mutant.

**CRISPR/Cas9 "PAM" site**

|                 |     |     |     |     |     |     |     |     |     |     |     |     |     |     |     |     |     |     |     |
|-----------------|-----|-----|-----|-----|-----|-----|-----|-----|-----|-----|-----|-----|-----|-----|-----|-----|-----|-----|-----|
| <b>WT-Rbpr2</b> | ACC | TTT | GAC | AAA | CTG | GAC | TCT | TTG | AAG | GAC | TCA | CTT | GAA | CAG | ATT | GCA | TTG | TCC | TGC |
|                 | T   | F   | D   | K   | L   | D   | S   | L   | K   | D   | S   | L   | E   | Q   | I   | A   | L   | S   | C   |
|                 | 245 | 246 | 247 | 248 | 249 | 250 | 251 | 252 | 253 | 254 | 255 | 256 | 257 | 258 | 259 | 260 | 261 | 262 | 263 |

  

**\*delA**

|                              |     |     |     |     |     |     |     |     |      |     |     |     |     |     |     |     |     |     |     |
|------------------------------|-----|-----|-----|-----|-----|-----|-----|-----|------|-----|-----|-----|-----|-----|-----|-----|-----|-----|-----|
| <b>Rbpr2<sup>muz99</sup></b> | ACC | TTT | GAC | AAA | CTG | GAC | TCT | TTG | *AGG | ACT | CAC | TTG | AAC | AGA | TTG | CAT | TGT | CCT | GCA |
|                              | T   | F   | D   | K   | L   | D   | S   | L   | R    | T   | H   | L   | N   | R   | L   | H   | C   | P   | A   |
|                              | 245 | 246 | 247 | 248 | 249 | 250 | 251 | 252 | 253  | 254 | 255 | 256 | 257 | 258 | 259 | 260 | 261 | 262 | 263 |

  

**"SYL" proposed RBP4 binding residues**

|                 |     |     |     |     |          |     |     |     |          |          |     |     |     |     |     |     |     |     |     |
|-----------------|-----|-----|-----|-----|----------|-----|-----|-----|----------|----------|-----|-----|-----|-----|-----|-----|-----|-----|-----|
| <b>WT-Rbpr2</b> | AAT | CAG | ACT | GAG | AGT      | GTG | TTC | ACA | TAC      | CTT      | ATT | CCC | AGC | ATC | AAT | ATG | AGT | TCA | GCA |
|                 | N   | Q   | T   | E   | <u>S</u> | V   | F   | T   | <u>Y</u> | <u>L</u> | I   | P   | S   | I   | N   | M   | S   | S   | A   |
|                 | 264 | 265 | 266 | 267 | 268      | 269 | 270 | 271 | 272      | 273      | 274 | 275 | 276 | 277 | 278 | 279 | 280 | 281 | 282 |

  

|                              |     |     |     |     |     |     |     |     |     |     |     |     |     |     |     |             |     |     |     |
|------------------------------|-----|-----|-----|-----|-----|-----|-----|-----|-----|-----|-----|-----|-----|-----|-----|-------------|-----|-----|-----|
| <b>Rbpr2<sup>muz99</sup></b> | ATC | AGA | CTG | AGA | GTG | TGT | TCA | CAT | ACC | TTA | TTC | CCA | GCA | TCA | ATA | TGA         | GTT | CAG | CAT |
|                              | I   | R   | L   | R   | V   | C   | S   | H   | T   | L   | F   | P   | A   | S   | I   | <b>stop</b> | V   | Q   | H   |
|                              | 264 | 265 | 266 | 267 | 268 | 269 | 270 | 271 | 272 | 273 | 274 | 275 | 276 | 277 | 278 | 279         | 280 | 281 | 282 |

**Figure S4. Functional consequences of the CRISPR/Cas9 generated *rbpr2<sup>fs-muz99</sup>* mutant zebrafish line.**

The 1bp deletion in this *rbpr2* mutant line resulted in a frameshift, and in the downstream disruption of the RBP4 binding residues, resulting in a pre-mature stop codon after the proposed RBP4 functional domain in Rbpr2.

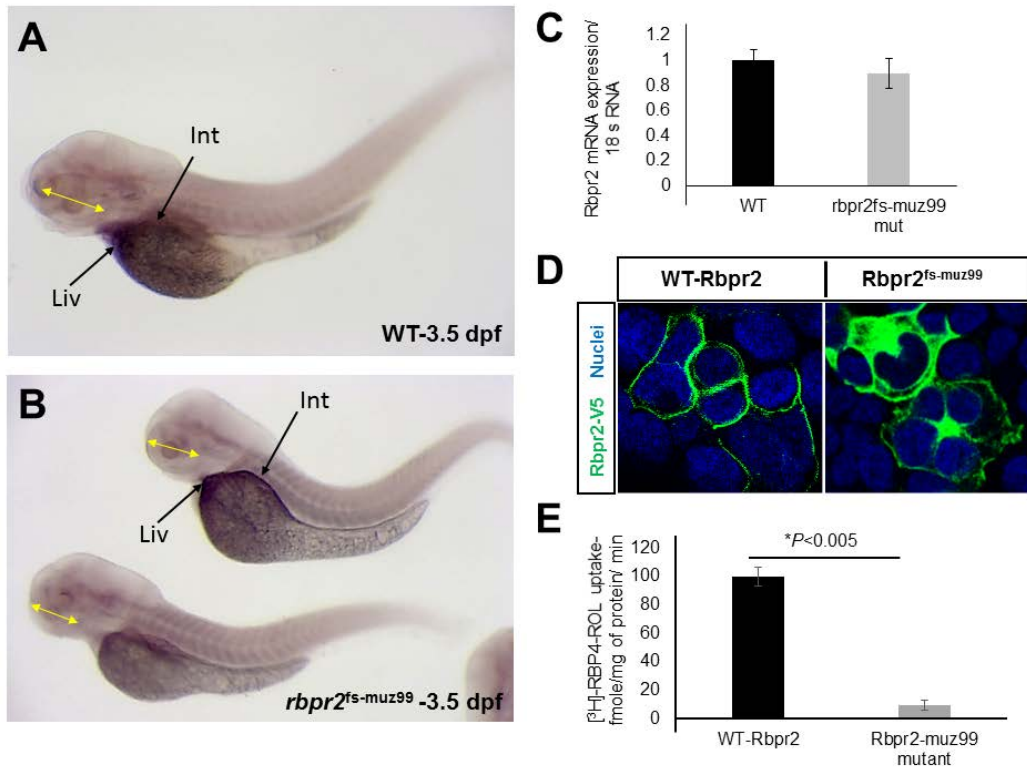

**Figure S5. Functional characterization of the *rbpr2*<sup>fs-muz99</sup> mutant.**

(A, B) Rbpr2 mRNA expression patterns in WT-larvae (A), and *rbpr2*<sup>fs-muz99</sup> mutants (B) at 3.5-days post fertilization (dpf) analyzed by whole mount *In-situ* Hybridization (WISH). (C) Zebrafish Rbpr2 mRNA expression quantification by Q-RTPCR. (D) Functional characterization of the *rbpr2*<sup>fs-muz99</sup> mutant by protein localization analysis in NIH3T3 cells. Scale bar=50μm. (E) [<sup>3</sup>H]ROL-RBP4 uptake assays in NIH3T3 cells expressing either WT-Rbpr2 or *rbpr2*<sup>fs-muz99</sup> mutant.

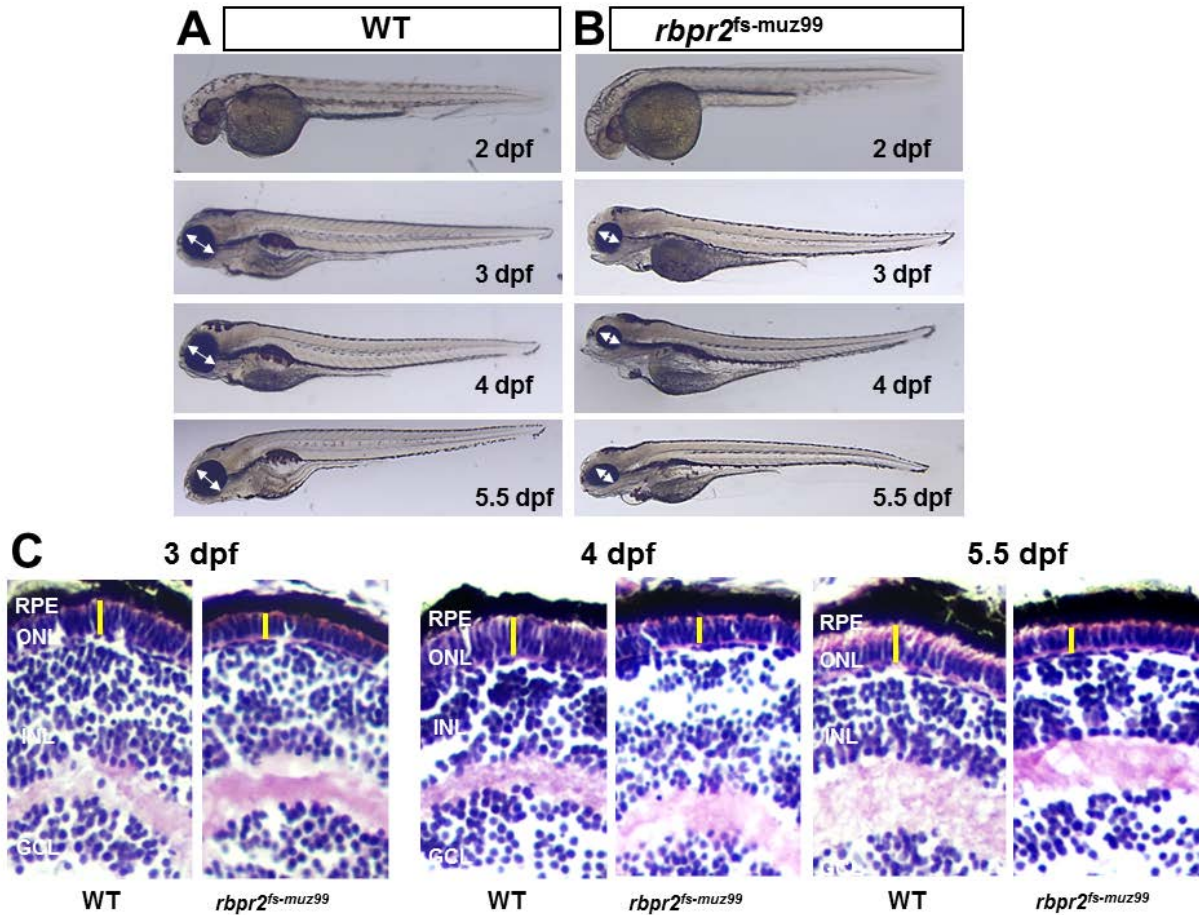

**Figure S6. Manifestation of early eye phenotypes in *rbpr2*-RBP4<sup>fs-muz99</sup> mutants.**

Compared to WT animals (A), loss of Rbpr2 in *rbpr2*-RBP4 mutant animals (B) manifests in early eye phenotypes during developmental stages. Systemic phenotypes in *rbpr2*-RBP4 mutant animals is attributable to general defects in retinoid metabolism during late larval stages. (C) Retinal histology and H&E staining of retinas from 3, 4 and 5.5 dpf WT and *rbpr2*-mutants. Photoreceptor outer segments (OS) appear shorter as compared to WT retinas at similar development time-points. Retinal lamination layers in mutants, like in WT larvae, were well preserved at the indicated time points of analysis. OS, outer segments; IS, inner segments; ONL, outer nuclear layer; INL, inner nuclear layer; WT, wild-type; dpf, days post fertilization.



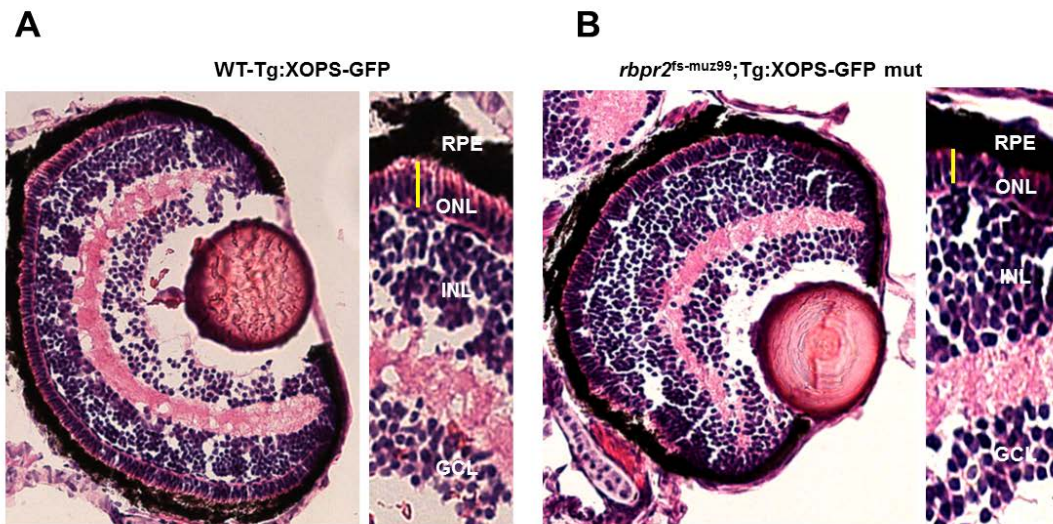

**Figure S7. Retinal phenotypes of *rbpr2*<sup>fs-muz99</sup>;Tg:XOPS-GFP mutant animals at 5.5 dpf.**

Compared to WT-Tg:XOPS-GFP zebrafish (A), eyes of F3 generation *rbpr2*<sup>fs-muz99</sup>;Tg:XOPS-GFP mutant animals (B) were smaller, and showed shorter photoreceptor layer outer segments by H&E analysis. ONL, outer nuclear layer; INL, inner nuclear layer; GCL, ganglion cell layer; dpf, days post fertilization; RPE, retina pigmented epithelium.



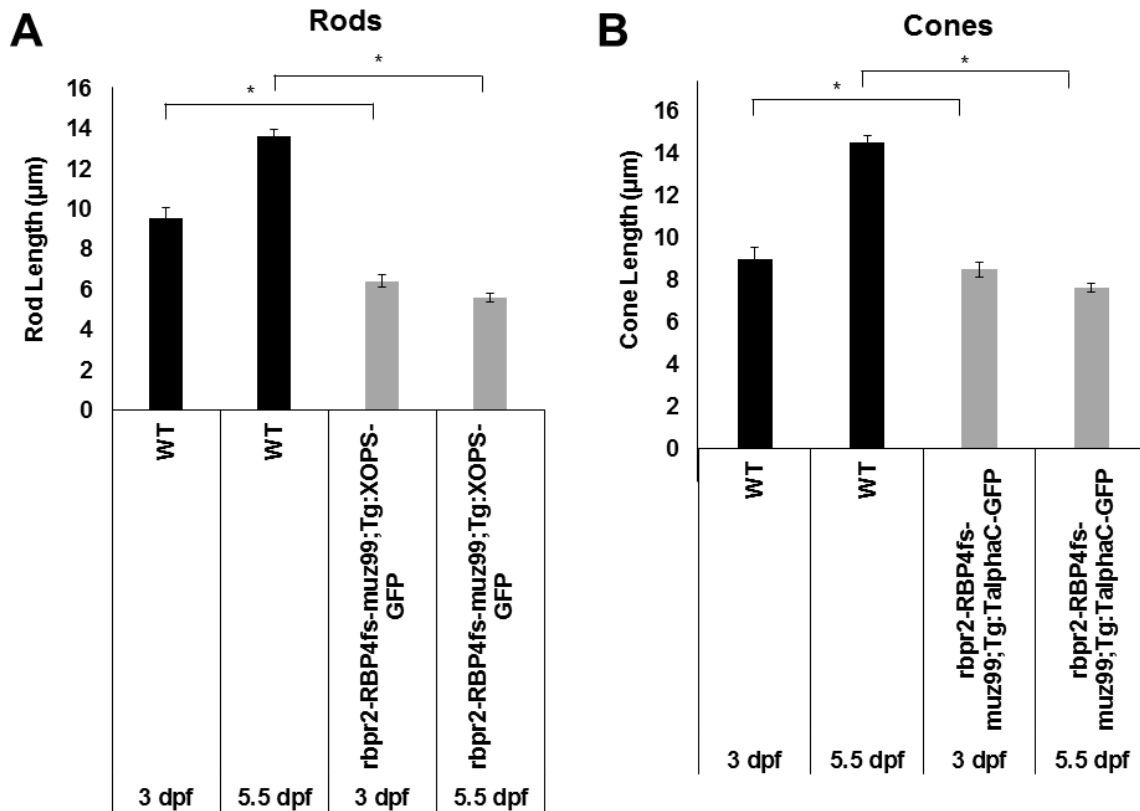

**Figure S8. Quantification of photoreceptor length in *rbpr2*<sup>fs-muz99</sup> mutant animals.**

Image J was used to quantify and measure GFP staining along the length of the photoreceptors (from the photoreceptor synapse to the apical edge of the inner segment) in rods (**A**) and cones (**B**) in both WT and *rbpr2*-mutant animals at 3 dpf and 5.5 dpf time points. Approximately 150 cones and rods in WT and *rbpr2* mutant retinas were counted and sized.

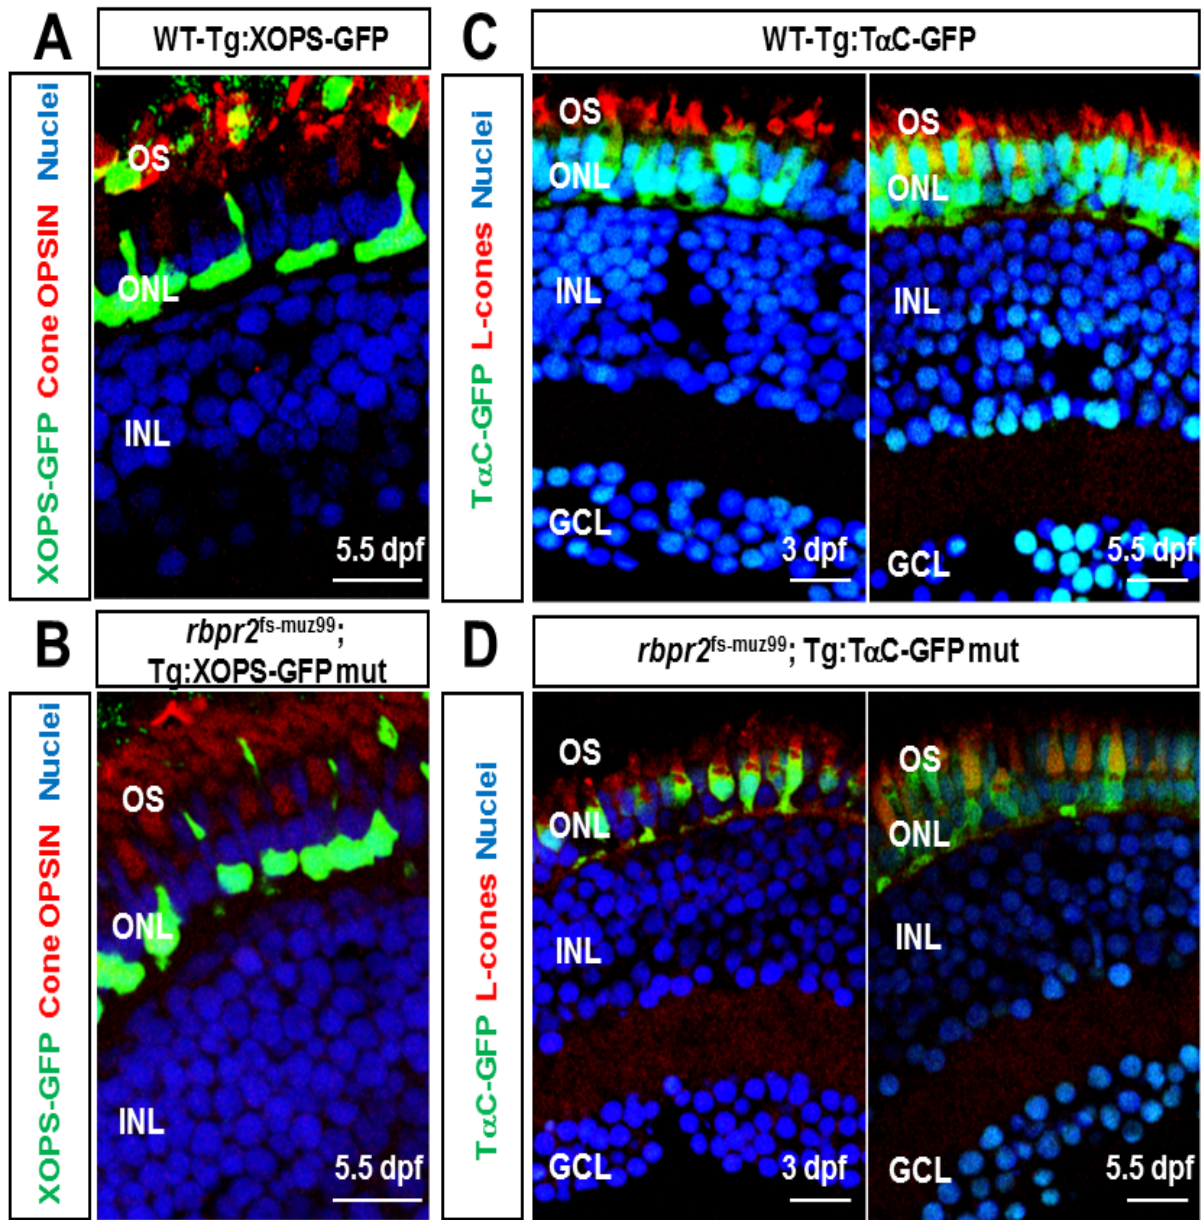

**Figure S9. Counterstaining in transgenic *rbpr2*<sup>fs-muz99</sup> mutants.** (A, B) WT-Tg:XOPS-GFP and *rbpr2*<sup>fs-muz99</sup>;Tg:XOPS-GFP mutant retinas that express GFP in rods only were counter stained with R/G cone opsin antibody followed by Alexa 594. (C, D) WT Tg:TαC-GFP and *rbpr2*<sup>fs-muz99</sup>;Tg:TαC-GFP mutant retinas that express GFP in cones only were counter stained with 1D4 (L-cones) antibody followed by Alexa 594. Nuclei were stained with DAPI. (A, B) scale bar=50μm; (C, D) scale bar=75μm. OS, outer segments; INL, Inner nuclear layer; ONL, Outer nuclear layer; dpf, days post fertilization; IS, Inner segments.

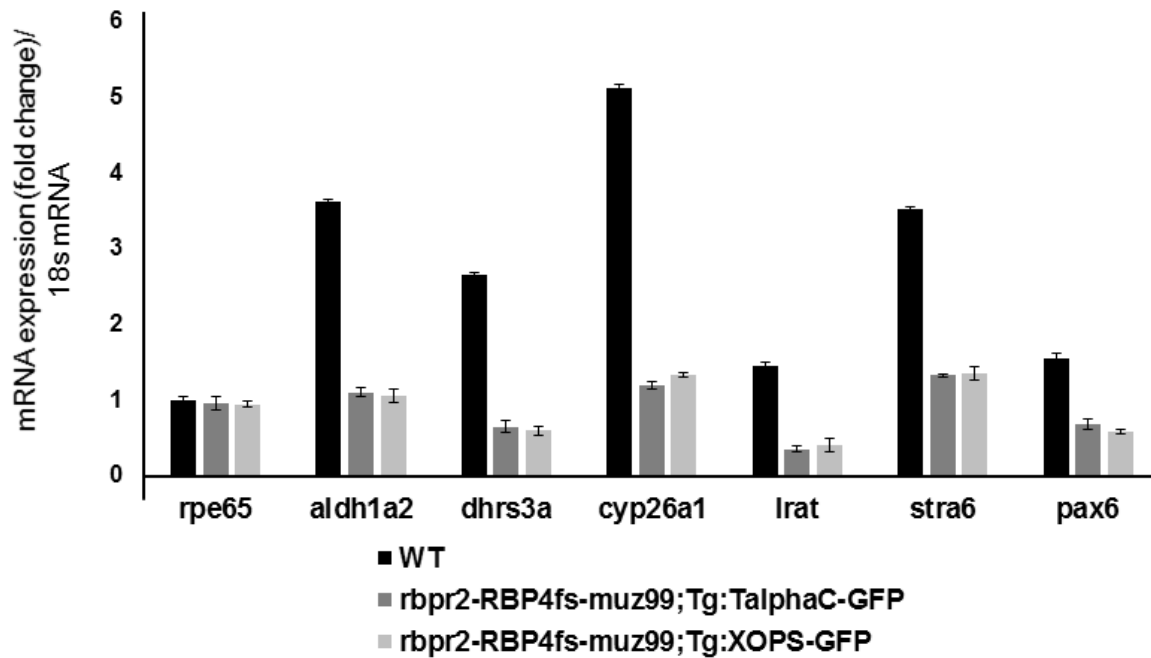

**Figure S10. Downregulation of retinoid signaling regulated genes in *rbpr2*<sup>fs-muz99</sup> mutant zebrafish eyes.**

Retina-specific gene expression dependent on RA signaling were compared by qPCR using equal amounts of total RNA from heads of wild-type/ control (black bars) and *rbpr2*<sup>fs-muz99</sup> mutants (grey bars) at 3.5 dpf. Rpe65 mRNA expression values were set to 1 and difference in gene expression between the two genotypes are shown as relative fold change normalized to endogenous 18S RNA. \*p<0.005.

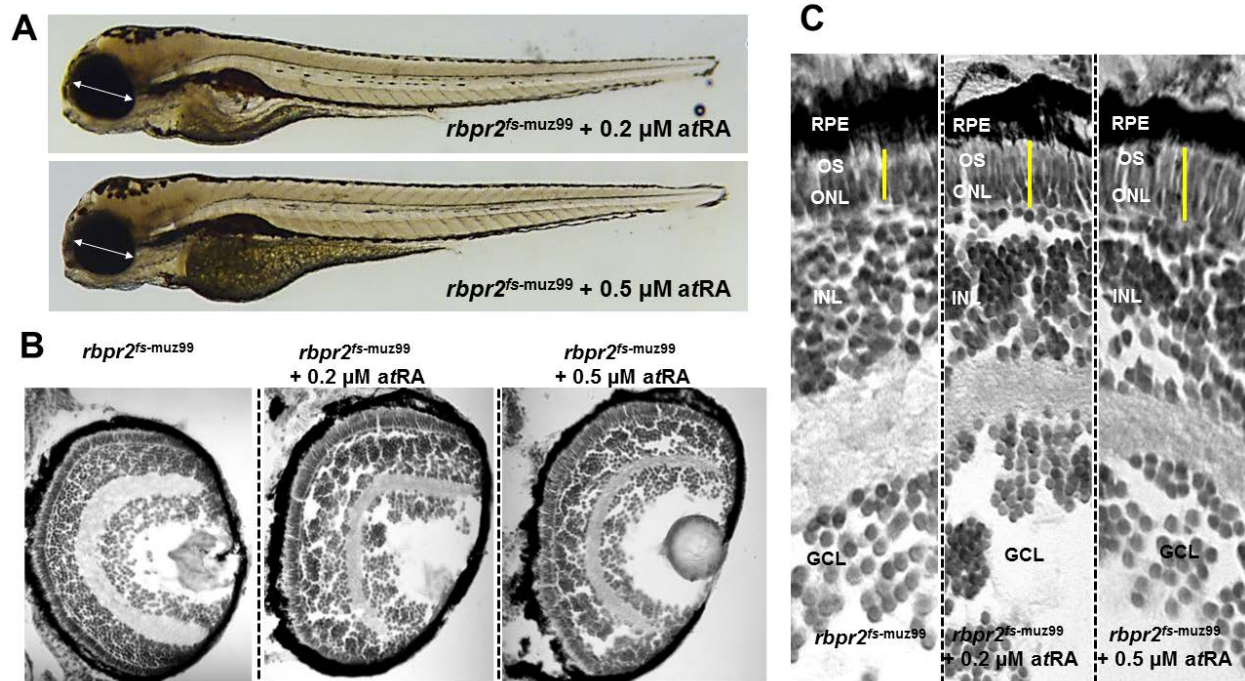

**Figure S11. All-*trans* retinoic acid rescues the *rbpr2*<sup>fs-muz99</sup> mutant phenotype.**

(A) Dose specific treatment with all-*trans* retinoic acid (atRA) rescues the *rbpr2*<sup>fs-muz99</sup> mutant phenotype. Images obtained at 5-5.5 dpf. Rescue experiments of *rbpr2* mutants with either mRNA or atRA were repeated twice as outlined in methods. (B, C) Representative images of eye sections from atRA treated *rbpr2*<sup>fs-muz99</sup> mutants at 5.5 dpf. RPE, retinal pigmented epithelium; OS, outer segments; INL, inner nuclear layer; ONL, outer nuclear layer; dpf, days post fertilization.

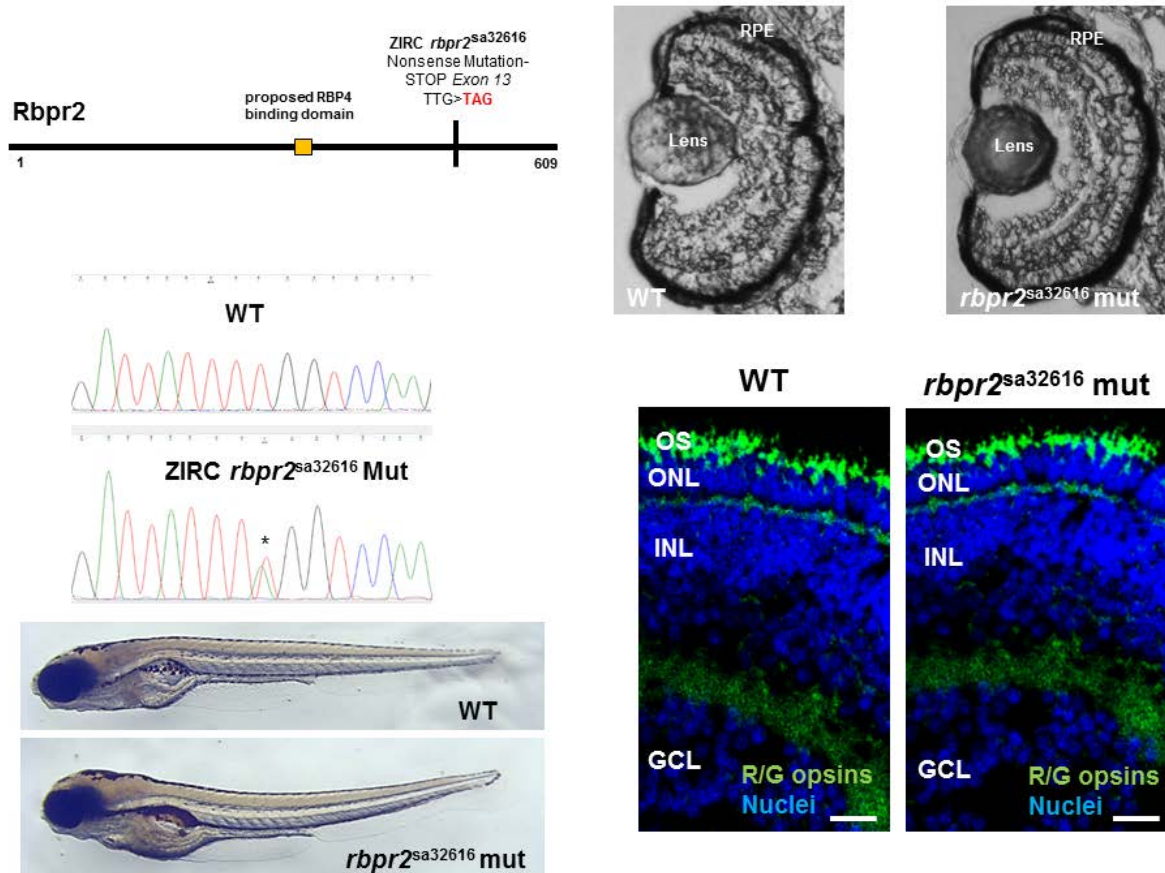

**Figure S12. ZIRC *rbpr2* mutants (*rbpr2*<sup>sa32616</sup>) encompassing a mutation after the proposed RBP4 binding sites in *Rbpr2* do not show eye phenotypes.**

A *rbpr2* mutant zebrafish line (G>A mutation; *rbpr2*<sup>sa32616</sup>) from the Zebrafish International Resource Center (ZIRC) which results in a premature stop codon in exon 13, was obtained and analyzed by light microscopy, histology and immunohistochemistry at 5.5 dpf. With the exception of a curved/ bent tail, no other significant phenotype was observed in this zebrafish *rbpr2*-mutant. Note: The TTG>TAG mutation in exon 13 of the *Rbpr2* coding sequence occurs "after" the proposed RBP4 binding sites. Immunostaining for cone photoreceptors (R/G opsins antibody) revealed that cones in both WT and mutants at 5.5 dpf were similar in number and showed normal morphology. OS, outer segments; IS, inner segments; PRL, photoreceptor cell layer; ONL, outer nuclear layer; INL, inner nuclear layer; GCL, ganglion cell layer; WT, wild-type; dpf, days post fertilization.
